# Supplementary material
Source: PubMed Central journal article supplement (PMC3835353)
Supplement: NIHMS524335-supplement-1.pdf [file NIHMS524335-supplement-1.pdf]

**Reducing cannabinoid abuse and preventing relapse by enhancing endogenous brain levels  
of kynurenic acid**

Zuzana Justinova, Paola Mascia, Hui-Qiu Wu, Maria E. Secci, Godfrey H. Redhi, Leigh V. Panlilio, Maria Scherma, Chanel Barnes, Alexandra Parashos, Tamara Zara, Walter Fratta, Marcello Solinas, Marco Pistis, Jack Bergman, Brian D. Kangas, Sergi Ferré, Gianluigi Tanda, Robert Schwarcz & Steven R. Goldberg

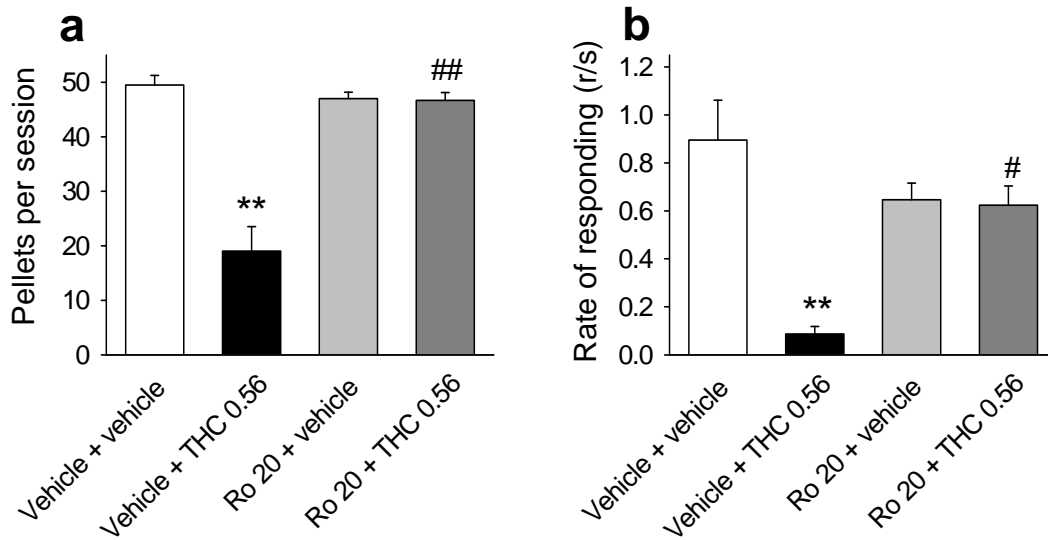

**Supplementary Figure 1** Ro 61-8048 reverses the depressant effects of THC on food self-administration in monkeys. THC (0.56 mg/kg, i.v., immediately before the session) significantly decreased the number of food pellets self-administered over one-h sessions (**a**) and also decreased overall response rates (**b**) by squirrel monkeys under a fixed-ratio ten (FR10) schedule. Ro 61-8048 (20 mg/kg i.m., 40 min before session) did not significantly affect food-reinforced behavior, but reversed the effects of THC. The number of food pellets per session (**a**) and overall response rates in the presence of the green light signaling food availability (**b**) are shown. Each bar represents the mean  $\pm$  s.e.m (n = 3). \*\* $P < 0.01$ , *post-hoc* vs. vehicles condition; #  $P < 0.05$ , ##  $P < 0.01$ , *post-hoc* vs. vehicle + THC 0.56 condition, Bonferroni test.
